# Supplementary material for: Protein Arginine Methyltransferase 5 Inhibition Upregulates Foxp3+ Regulatory T Cells Frequency and Function during the Ulcerative Colitis
Source: PubMed Central journal article supplement (PMC5440547; doi:10.3389/fimmu.2017.00596), 2017-05-23
Supplement: data_sheet_1.pdf [file data_sheet_1.pdf]

## Protein arginine methyltransferase inhibition regulates Foxp3<sup>+</sup> regulatory T cell function during intestinal inflammation

Yingxia Zheng,<sup>1, 2, #</sup> Liya Huang,<sup>3, #</sup> Wensong Ge,<sup>4</sup> Ming Yang,<sup>5</sup> Yanhui Ma,<sup>1</sup> Guohua Xie,<sup>1</sup> Weiwei Wang,<sup>1</sup> Bingxian Bian,<sup>1</sup> Li Li,<sup>1</sup> Hong Nie,<sup>6</sup> Lisong Shen<sup>1,\*</sup>

### Supplementary information

#### Cell viability

The viability of spleen cells was analyzed by CellTiter-Glo luminescent assay (Promega, Madison, WI) after treated spleen cells with different concentrations of AMI-1 according to the manufacture's introduction. In brief, splenocytes were cultured in a 96-well microplate at  $1 \times 10^5$  cells per well and stimulated with anti-CD3 and anti-CD28 (BD Bioscience) at  $1 \mu\text{g/ml}$ . Medium with AMI-1 (Sigma-Aldrich) at final concentrations of 0.1, 1, 10, 100, and 500  $\mu\text{M}$  was added to all but the control wells and incubated for 72 h. After culturing, the luminescence values were measured with microplate computer software (Bio-Rad Laboratories).

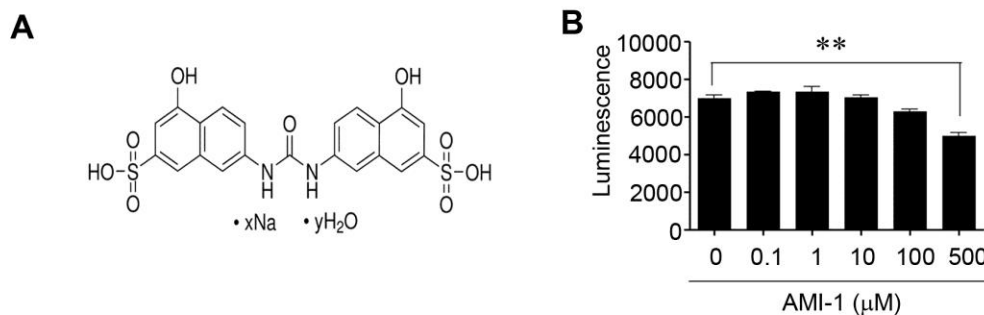

Supplementary Fig. 1: AMI-1. (A) The AMI-1 chemical structure. (B) Cell viability was evaluated, as measured by luminescence in C57/BL6 mouse splenocytes stimulated with  $1 \mu\text{g/ml}$  anti-CD3 and anti-CD28 and cultured in the presence of increasing AMI-1 concentrations.  $**P < 0.01$ .

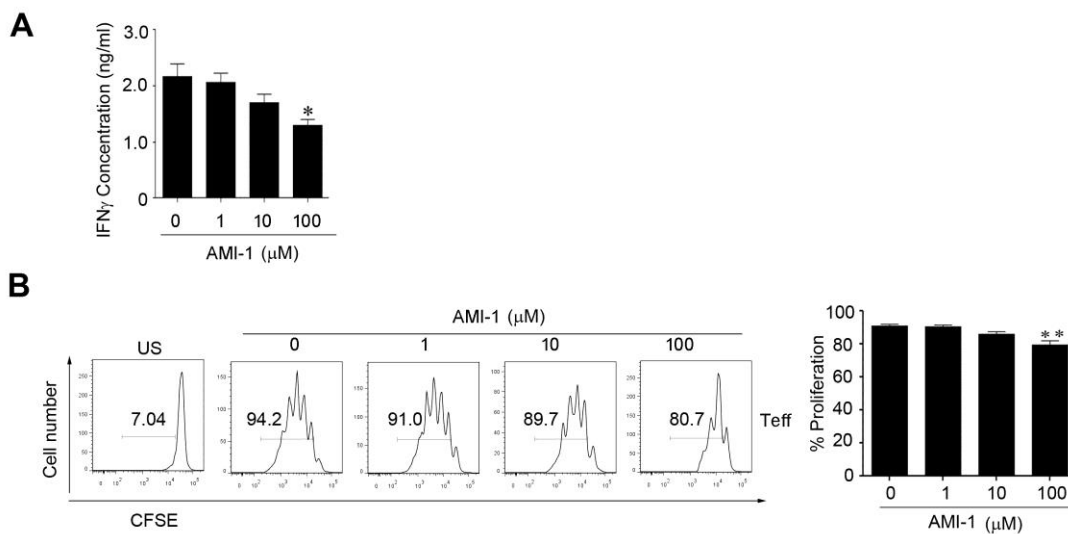

Supplementary Fig. 2: AMI-1 down-regulates IFN- $\gamma$  secretion and cell proliferation in

CD4<sup>+</sup> T cells. CD4<sup>+</sup> T cells were treated with different AMI-1 concentrations and plated on anti-CD3 mAb-coated plates. After 48 h, the IFN $\gamma$  levels in the supernatants were determined with an ELISA (A). Additionally, the cellular proliferation level was assayed with CFSE after 96 h (B). A summary of three independent experiments is presented. The data shown are means  $\pm$  SEM in the right panel. The asterisks represent statistical significance between the groups, \* $P$ <0.05; \*\* $P$ <0.01.

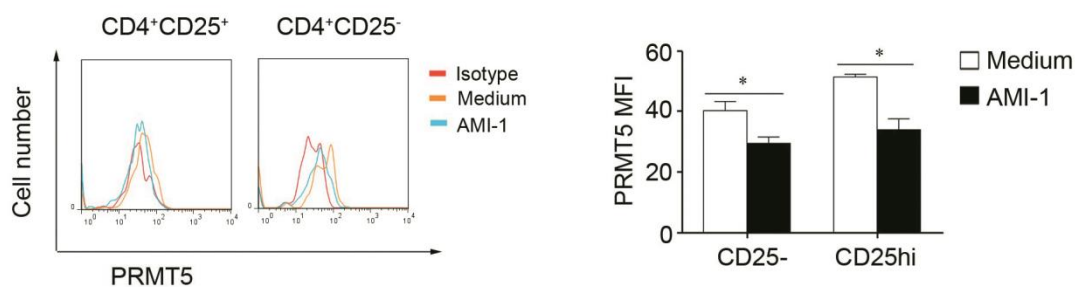

Supplementary Fig. 3: Treg and Teff cells were or were not treated with AMI-1 and analyzed with flow cytometry using antibodies specific for PRMT5 or an isotype control. The results are representative of three separate experiments. The  $P$  values represent statistical differences between the AMI-1-treated cells and the PBS-treated cells; \* $P$ <0.05.

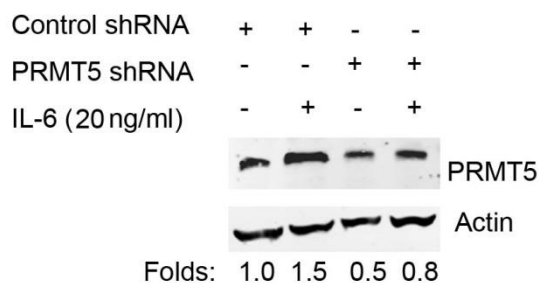

Supplementary Fig. 4: Tregs were sorted and electrophoretically transfected with mouse PRMT5 shRNA and treated with IL-6 20ng/ml or not. After 48 h, the PRMT5 expression level was measured using western blot analysis. Actin was utilized as the loading control.

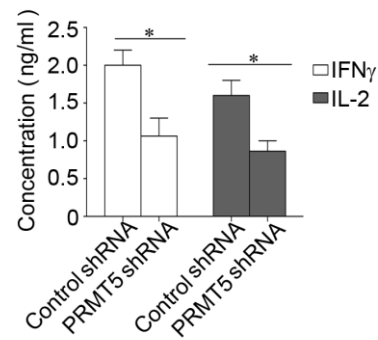

Supplementary Fig. 5: Reduction in PRMT5 protein levels by specific shRNA down-regulates IFN $\gamma$  secretion in CD4<sup>+</sup> T cells. CD4<sup>+</sup> T cells were transfected with shRNA targeting PRMT5 or with control shRNA and plated onto anti-CD3 mAb-coated plates. After 48 h, the PRMT5 expression level was measured with western blot (A) analysis and the IFN $\gamma$  and IL-2 levels in the supernatants were determined with ELISAs (B). A summary of three independent experiments is presented.

Supplementary Table 1. Mouse primers for q-PCR

| Gene           | Forward primer (5' to 3') | Reverse primer (5' to 3') |
|----------------|---------------------------|---------------------------|
| $\beta$ -actin | TGTCCACCTTCCAGCAGATGT     | AGCTCAGTAACAGTCCGCCTAGA   |
| PRMT1          | TACTACTTTGACTCCTATGCCCA   | ATGCCGATTGTGAAACATGGA     |
| PRMT2          | AGCGCCGAGAAAGACTACC       | GGCCTTGAAAAGAACTCCTTGA    |
| PRMT3          | CAGAGCACCAAAACACACTGG     | TCAGGGTCACAATGAGGGAAC     |
| PRMT4          | ATCGCCCTCTACAGCCATGA      | CTGTCTGCCCACACGACTG       |
| PRMT5          | CTGAATTGCGTCCCGAAATA      | AGGTTCTGAATGAACTCCCT      |
| PRMT6          | GATGGGCTACGGACTTCTGC      | GCATCTGGTTCGCTAATCGGG-3   |
| PRMT7          | TTGCCAGGTCATCCTATGCC      | GCCAATGTCAAGAACCAAGGC     |
| PRMT8          | ACGTGGTAGCAATCGAAGACA     | GCTCCTTCATGGCAACATCC      |
| PRMT10         | CCTCTTCAGAATGGGCTTTCG     | CCAGTTTGCTACGCGGTAAAA     |
| Foxp3          | GTGCCTGGTATATGCTCCCG      | TAGGGTTGGGCATTGGGTTC      |
| CTLA4          | AACTGCAGCTGCCTTCTAGG      | CTGCTAGCCAACACCACTGA      |
| PD-1           | AATGGCCTCTGTGGGTTCTG      | CTCCAAGGGTGGCTTTAGG       |
| GITR           | TGCCCAGCTATAACCCTTGGT     | CCGCTCTCATAACCCACTTC      |
